# Supplementary material for: Feasibility of Home-Based Pulmonary Rehabilitation of Pediatric Patients with Chronic Respiratory Diseases
Source: MDPI journal article supplement (doi:10.3390/children11050534), 2024-04-29
Supplement: s1 [file s1]

## Supplementary materials

**Table S1.** Satisfaction questionnaires after home-based pulmonary rehabilitation program

|                                                               |                                                                     | extremely<br>satisfied<br>(1) | very<br>satisfied<br>(2) | sometimes<br>satisfied<br>(3) | almost<br>never<br>satisfied<br>(4) | never<br>satisfied<br>(5) |
|---------------------------------------------------------------|---------------------------------------------------------------------|-------------------------------|--------------------------|-------------------------------|-------------------------------------|---------------------------|
| <b>I . Satisfaction with the video rehabilitation program</b> |                                                                     |                               |                          |                               |                                     |                           |
| 1                                                             | It is convenient to use.                                            |                               |                          |                               |                                     |                           |
| 2                                                             | Interesting.                                                        |                               |                          |                               |                                     |                           |
| 3                                                             | I am satisfied with the image and design.                           |                               |                          |                               |                                     |                           |
| 4                                                             | I am satisfied with the song and sound.                             |                               |                          |                               |                                     |                           |
| 5                                                             | This program is needed for pediatric chronic lung disease patients. |                               |                          |                               |                                     |                           |
| <b>II. Changes in daily life after the program</b>            |                                                                     |                               |                          |                               |                                     |                           |
| 1                                                             | I do more walking exercise after the program.                       |                               |                          |                               |                                     |                           |
| 2                                                             | I do more breathing exercises after the program.                    |                               |                          |                               |                                     |                           |
| 3                                                             | I became more interested in my respiratory health.                  |                               |                          |                               |                                     |                           |
| 4                                                             | I feel my breathing has improved.                                   |                               |                          |                               |                                     |                           |
